# Supplementary figures and images for: Characterization of a novel impedance cytometer design and its integration with lateral focusing by dielectrophoresis
Source: Royal Society of Chemistry journal article supplement (doi:10.1039/c2lc40551b), 2012-01-01

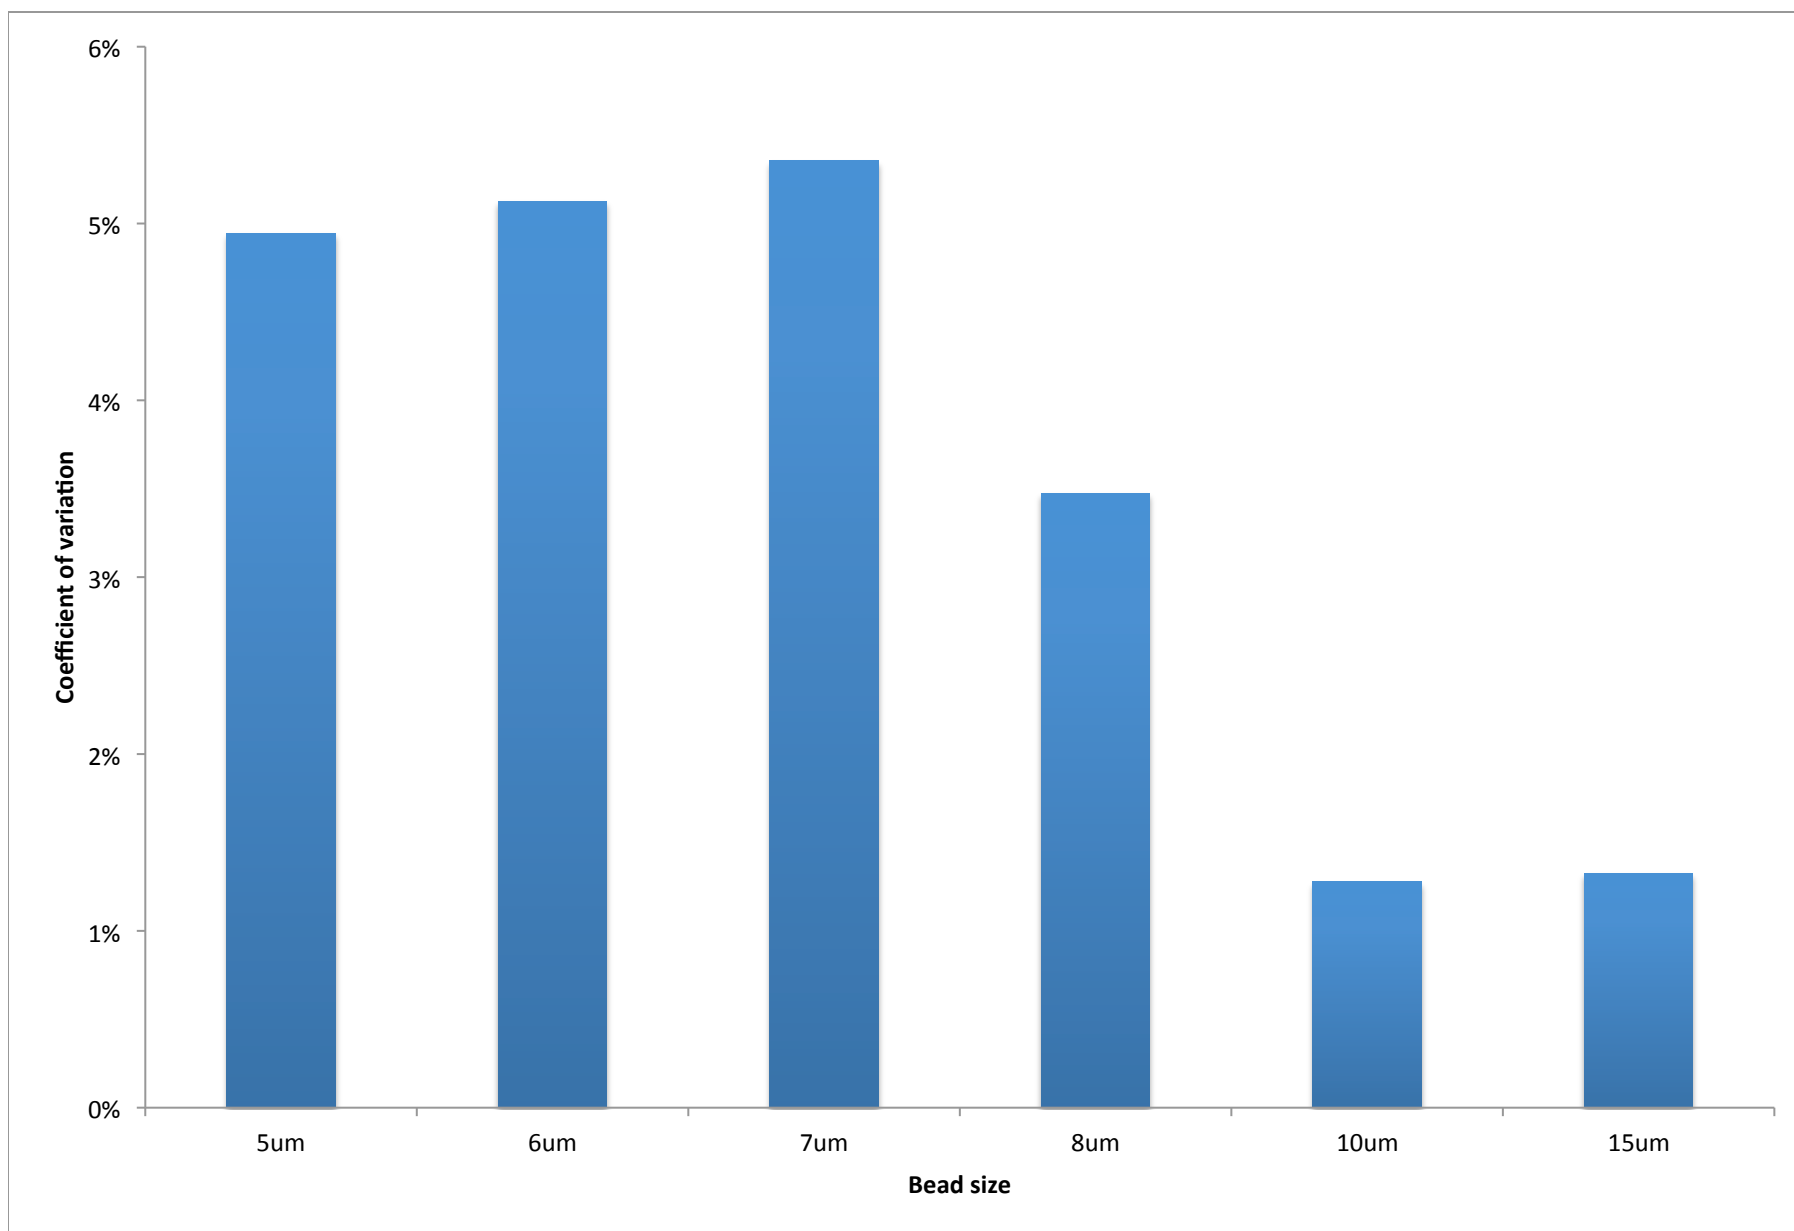

Supplement: c2lc40551b.pdf [file c2lc40551b.pdf]

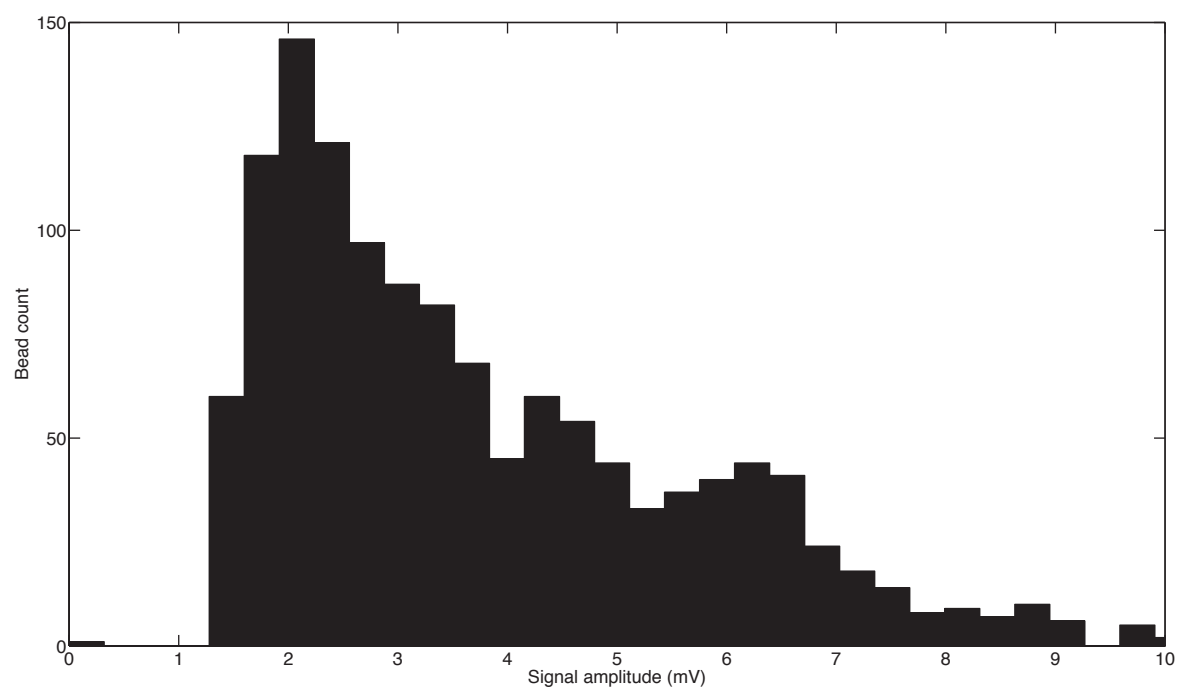

Supplement: c2lc40551b_2.pdf [file c2lc40551b_2.pdf]

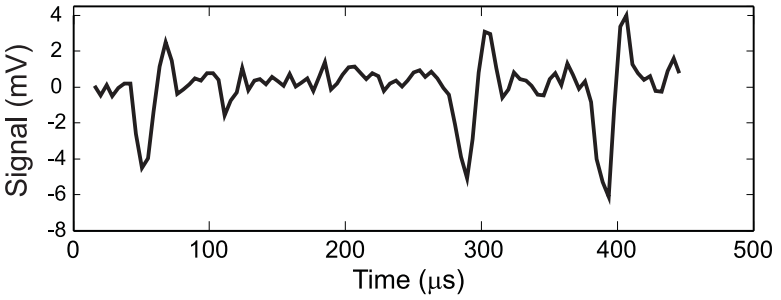

Supplement: c2lc40551b_3.pdf [file c2lc40551b_3.pdf]

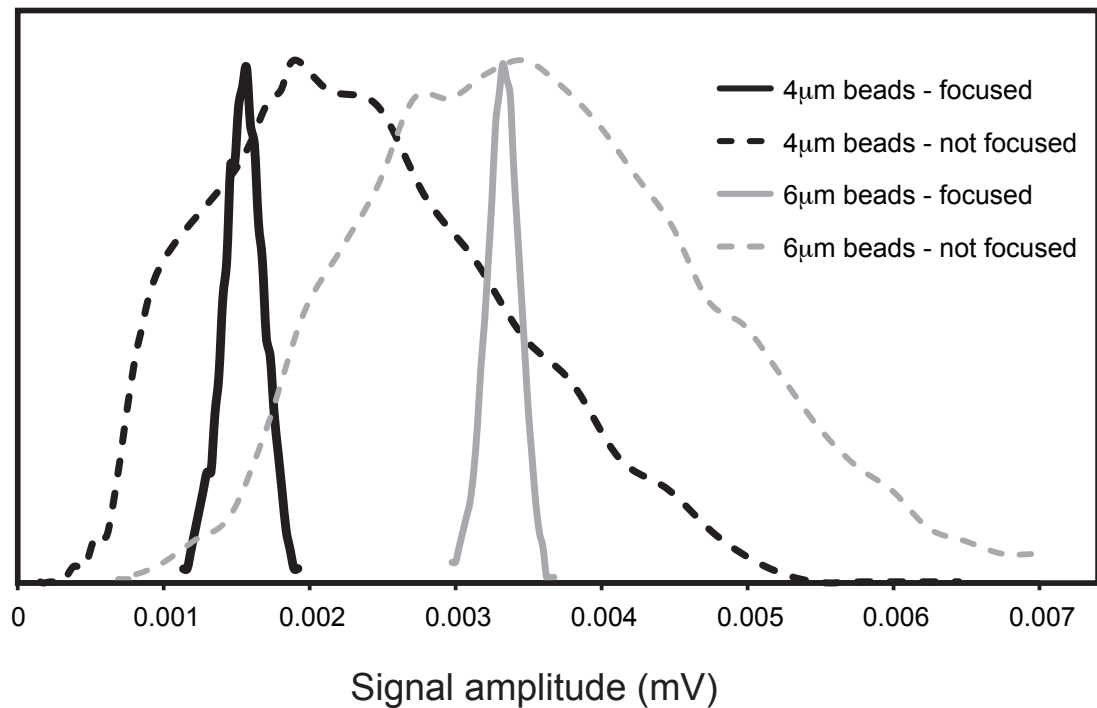

Supplement: c2lc40551b_4.pdf [file c2lc40551b_4.pdf]
